# Supplementary material for: Design and development of a fluorometric and colorimetric sensor for toxic cyanide detection by pyridinium scaffolds: live cell imaging and real sample analysis
Source: Royal Society of Chemistry journal article supplement (doi:10.1039/d2sd00163b), 2022-11-23
Supplement: d2sd00163b1.pdf [file d2sd00163b1.pdf]

## “Design and Development of a Fluorometric and Colorimetric sensor for Toxic cyanide detection by Pyridinium scaffolds: Live cell imaging and real samples analysis”

Kannan Jamuna<sup>a</sup>, Santhalingum Gayathri<sup>b</sup>, Shanmugam Sivakumar<sup>a</sup>, Balasubramaniam Ashokkumar<sup>b</sup>

<sup>a</sup> Department of Organic Chemistry, School of Chemistry, Madurai Kamaraj University, Madurai-625021.

<sup>b</sup> School of Biotechnology, Madurai Kamaraj University, Madurai-625021.

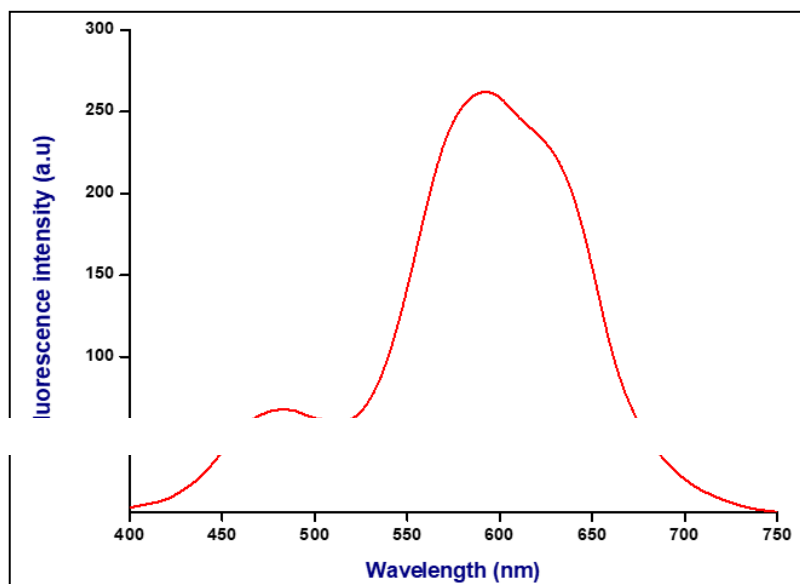

Figure S1: Emission spectra of probe Me-INDP ( $1 \times 10^{-5}$  M) in ACN/ 10% H<sub>2</sub>O

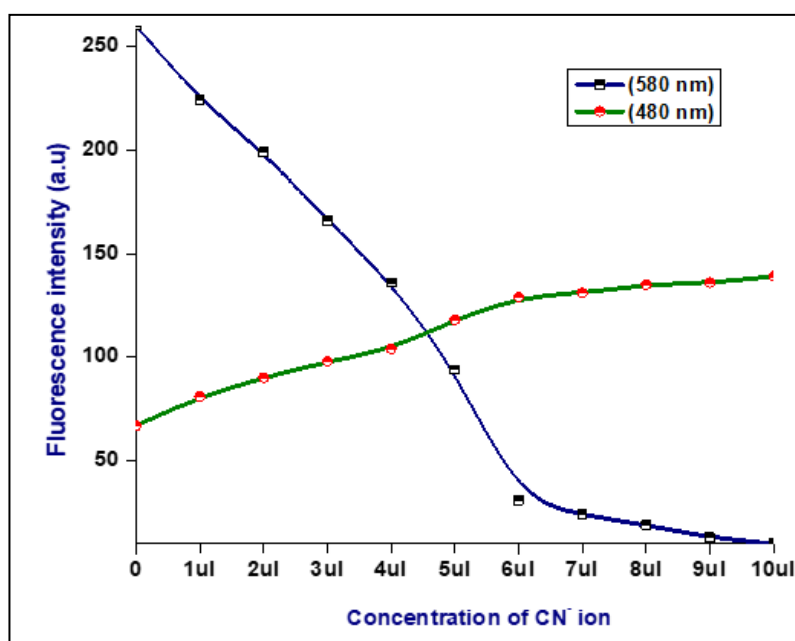

Figure S2: Sigmoidal plot of compound Me-INDP with different concentration of CN<sup>-</sup>.

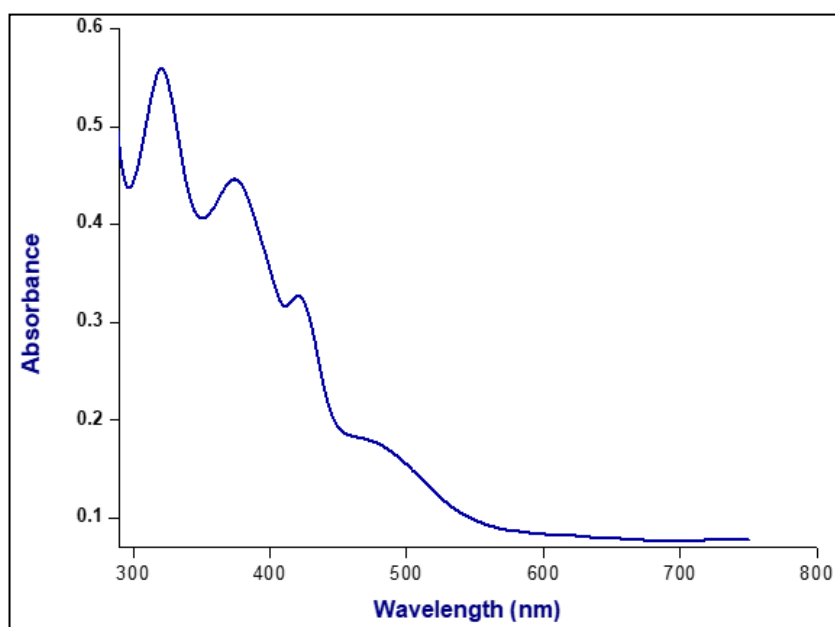

Figure S3: UV-Vis spectra of probe Me-INDP ( $1 \times 10^{-5}$  M) in ACN/ 10% H<sub>2</sub>O

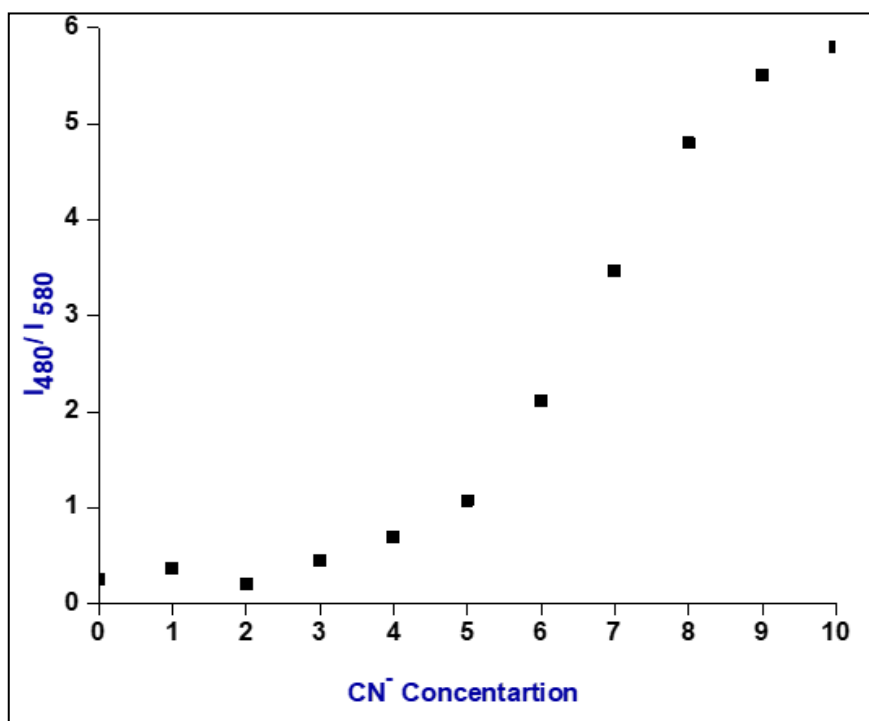

Figure S4: Changes in emission spectra of probe Me-INDP intensity ratio  $I_{480}/I_{580}$  with addition of various  $\text{CN}^-$  concentration

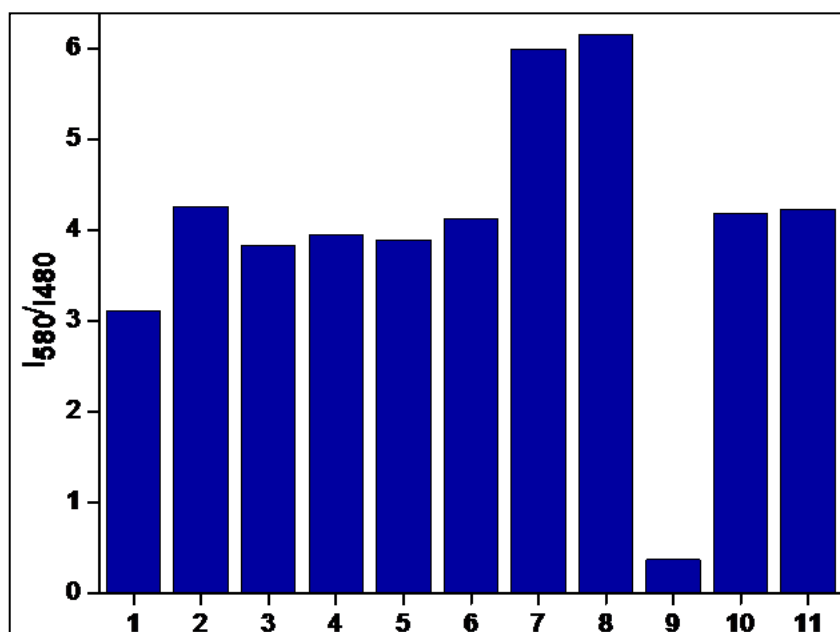

Figure S5: Fluorescence emission changes ratio  $I_{580}/I_{480}$  of probe Me-INDP ( $1 \times 10^{-5}$  M) at various anions (10  $\mu$ l) in ACN/ $H_2O$ . (1.  $F^-$ , 2.  $Cl^-$ , 3.  $SCN^-$ , 4.  $PO_4^{3-}$ , 5.  $SO_4^{2-}$ , 6.  $Br^-$ , 7.  $NO_2^-$ , 8.  $AcO^-$ , 9.  $CN^-$ , 10.  $HCO_3^-$ , 11.  $I^-$ ).

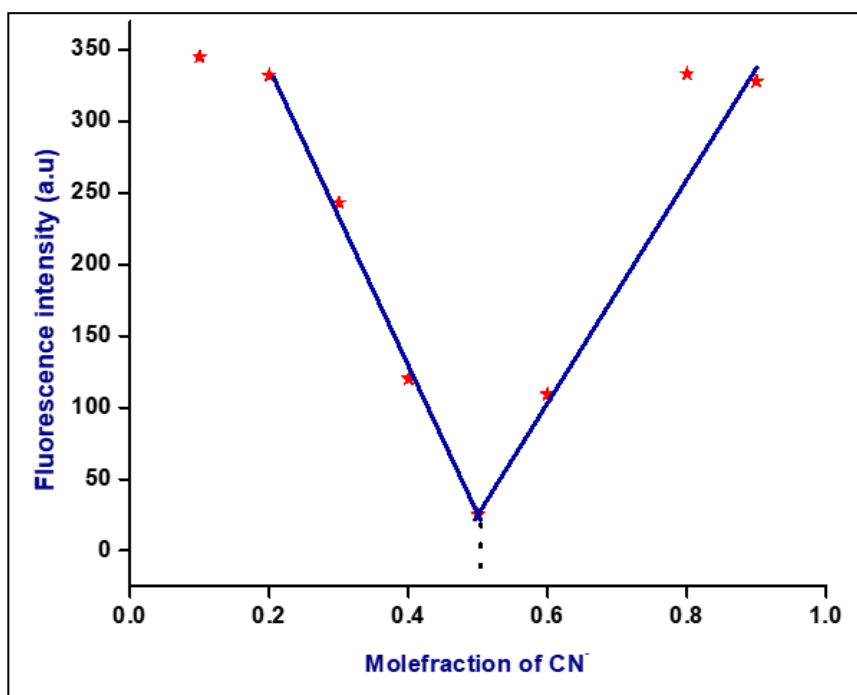

Figure S6: Job's plot

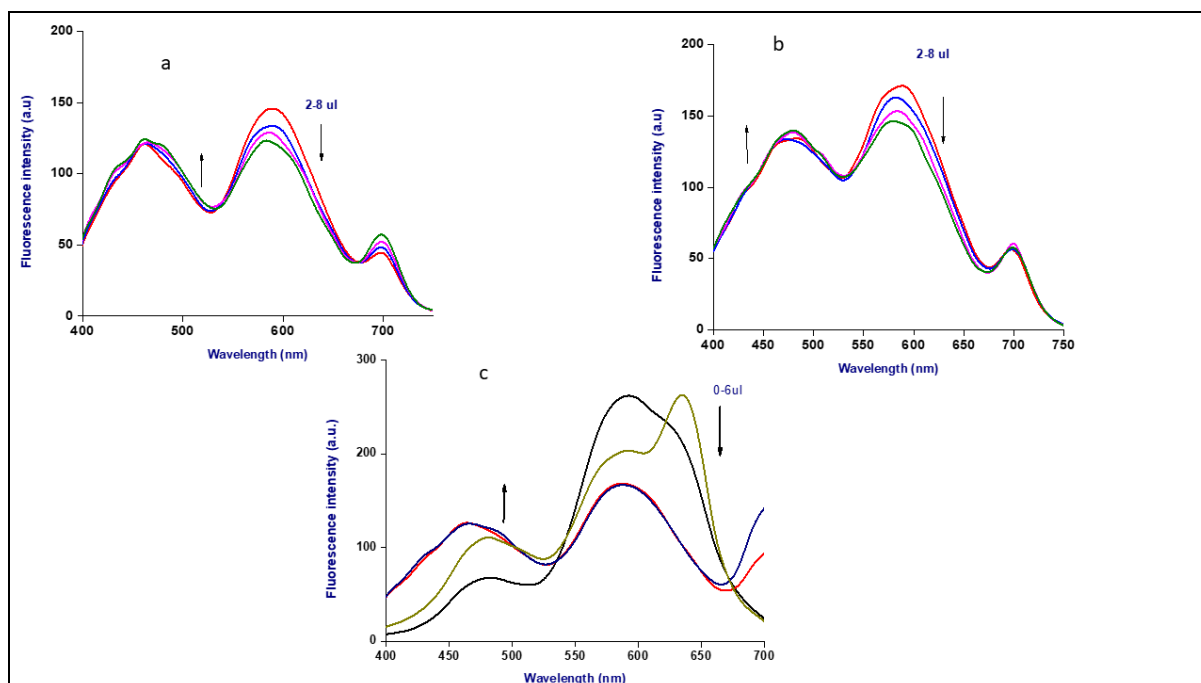

Figure S7: Emission spectra of probe Me-INDP with addition of various concentration real water samples (a) river water (b) tap water (c) sea water.

| Sample            | CN <sup>-</sup> spiked | Recovery |
|-------------------|------------------------|----------|
| Cassava flour     | -                      | 89%      |
| Almond            | -                      | 98%      |
| Sprouted potatoes | -                      | 96%      |
| River water       | $6.0 \times 10^{-3}$   | 101.78%  |
| Tap water         | $2.0 \times 10^{-3}$   | 96%      |
| Seawater          | $4.0 \times 10^{-3}$   | 90%      |

Table S1: Determination of CN<sup>-</sup> concentration in natural water and food samples.

**Binding Constant calculation:**

$$\text{Formula used } F_0/F = 1 + KSV[Q]$$

$F_0$  and  $F$  are fluorescence obtained intensities before and after addition of analyte.  $[Q]$  = concentration of quencher.  $KSV$  is Stern -Volmer quenching constant.

Slope value = 31.54, the calculated  $KSV = 3.15 \times 10^7 \text{ M}^{-1}$ .

**Limit of detection calculation:**

$$\text{Formula used } = 3\sigma/S$$

$\sigma$  is standard deviation,  $S$  is slope value. The calculated LOD value is  $1.2 \times 10^{-9} \text{ M}$ .

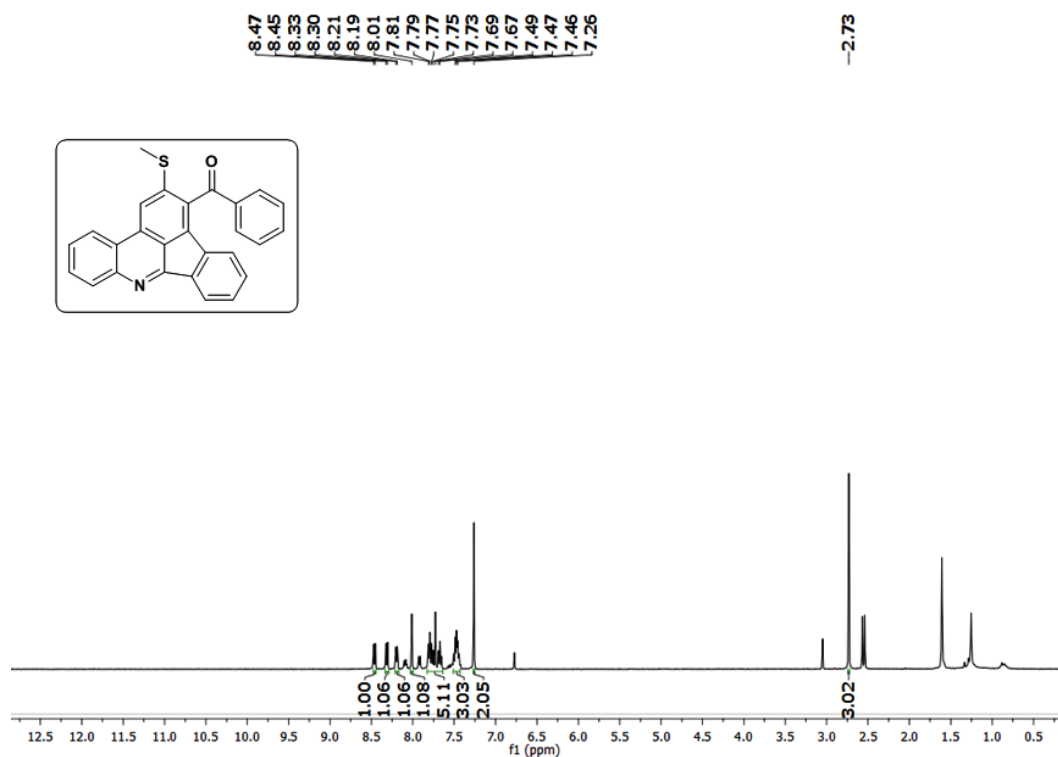

Figure S8: <sup>1</sup>H NMR spectrum of compound INDP

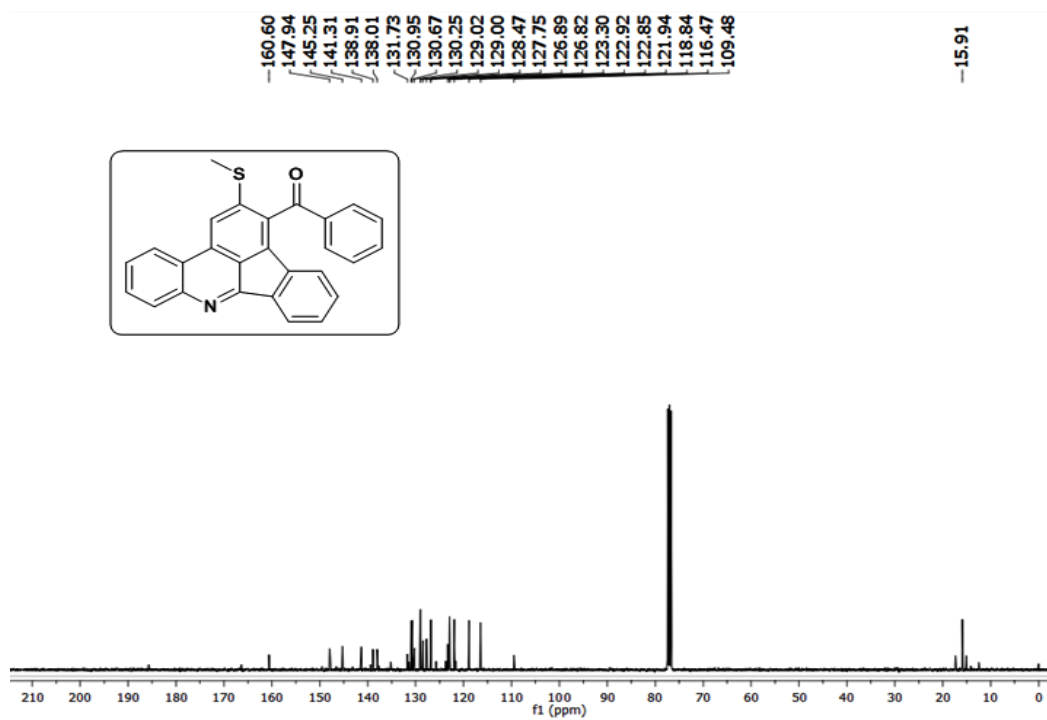

Figure S9:  $^{13}\text{C}$  NMR spectrum of compound INDP

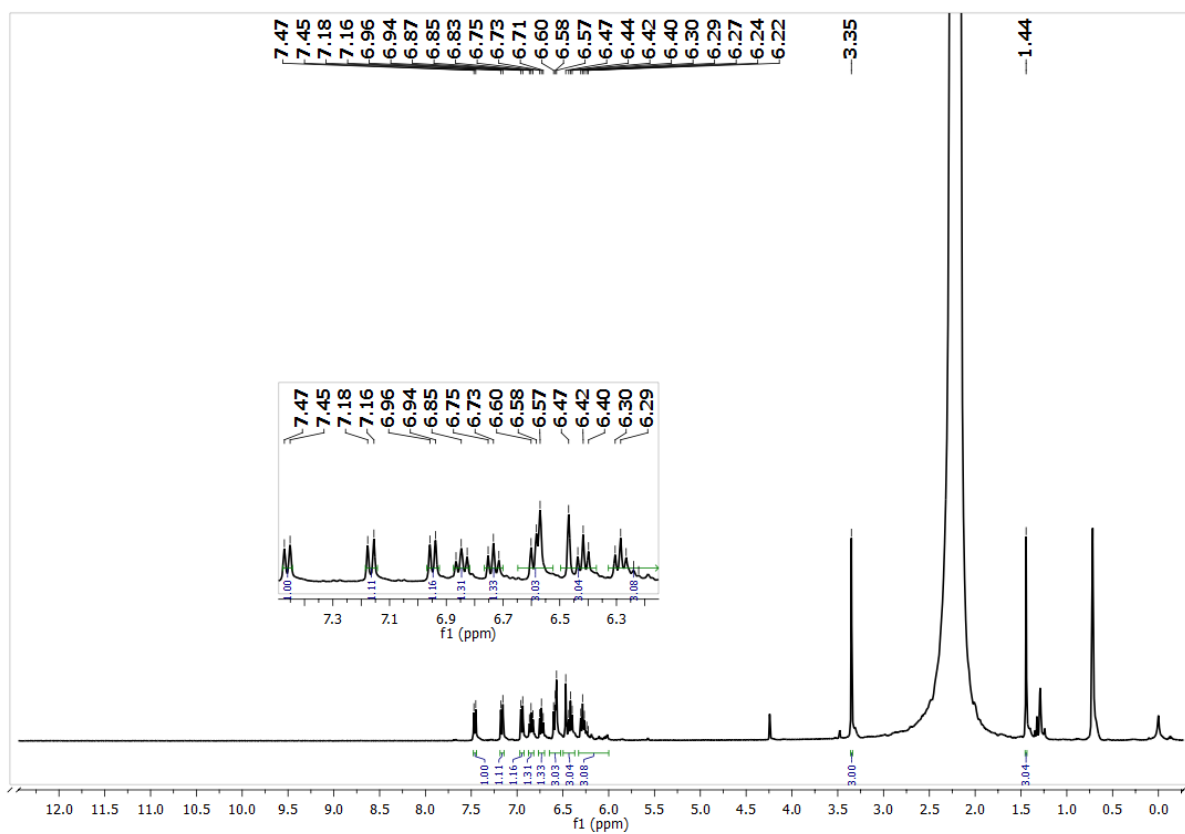

Figure S10: <sup>1</sup>H NMR spectrum of compound Me-INDP

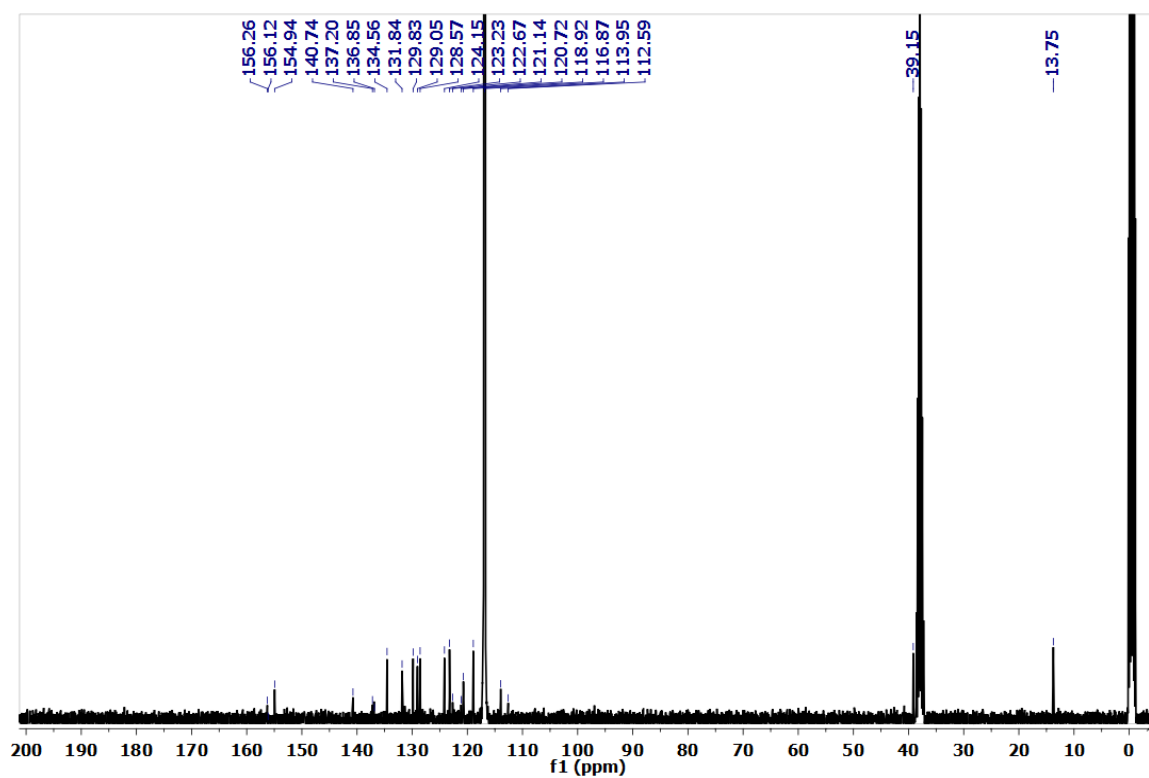

Figure S11: <sup>13</sup>C NMR spectrum of compound Me-INDP

Fig

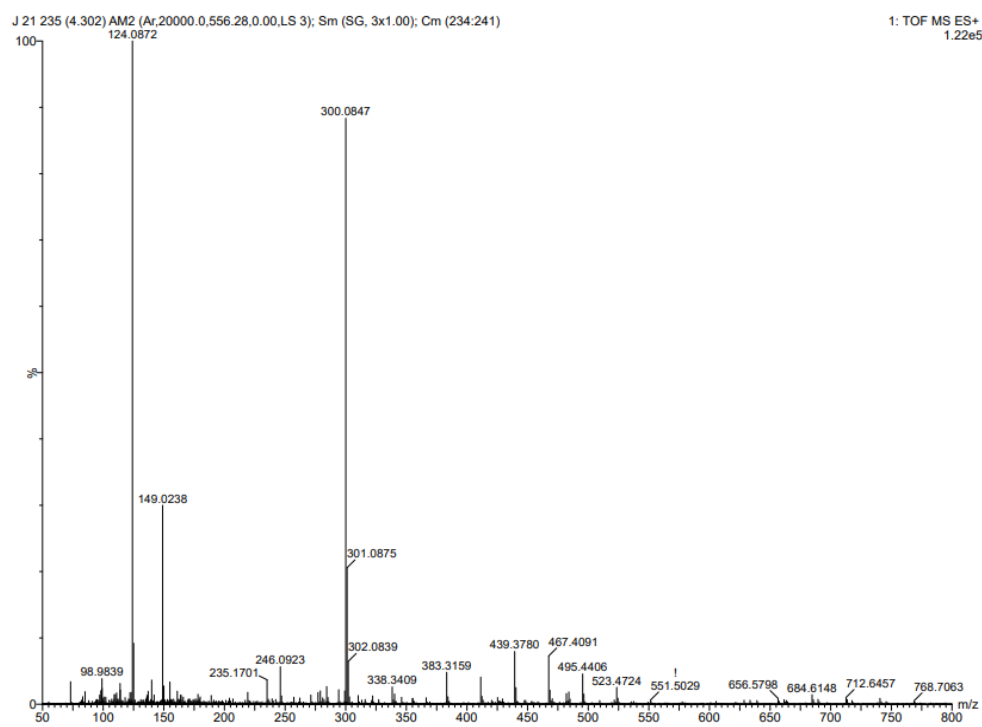

Figure S12: HRMS spectrum of compound INDP

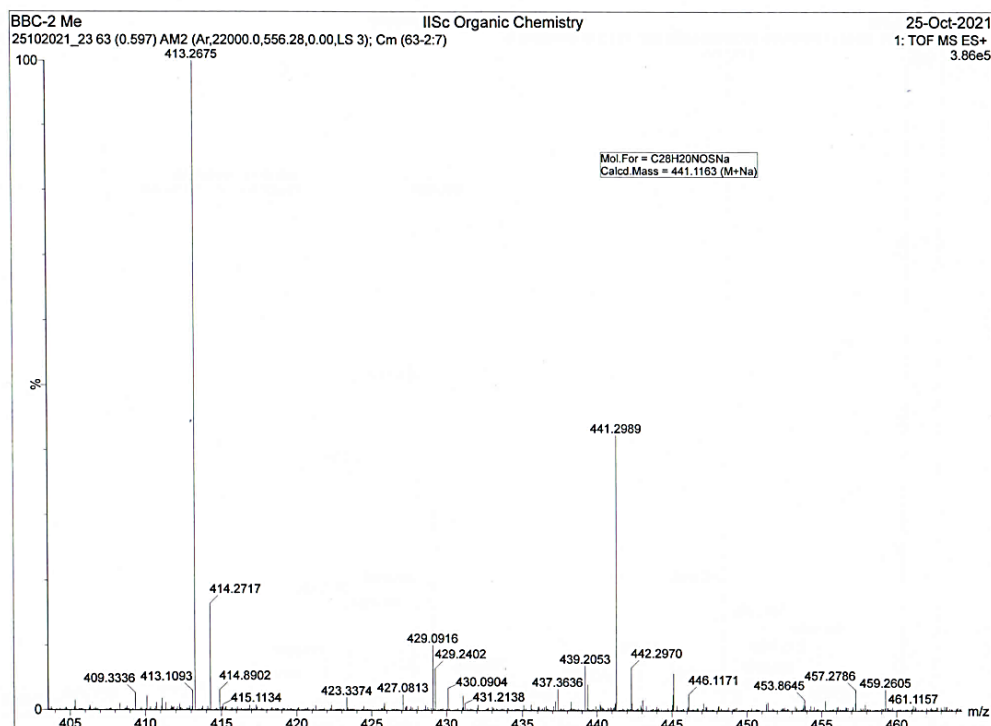

Figure S13: HRMS spectrum of compound Me-INDP



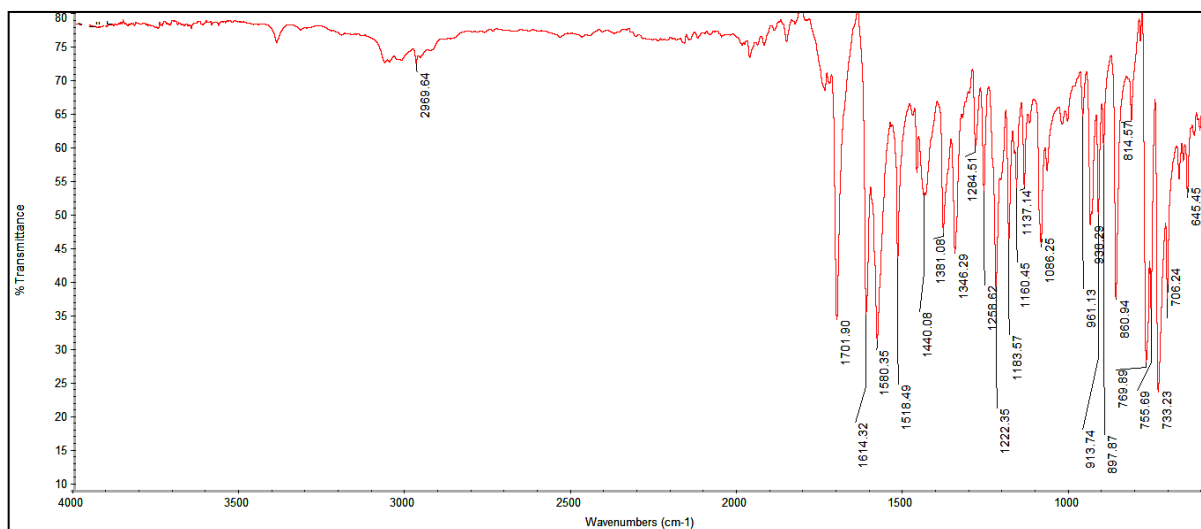

Figure S14: IR spectrum of compound INDP

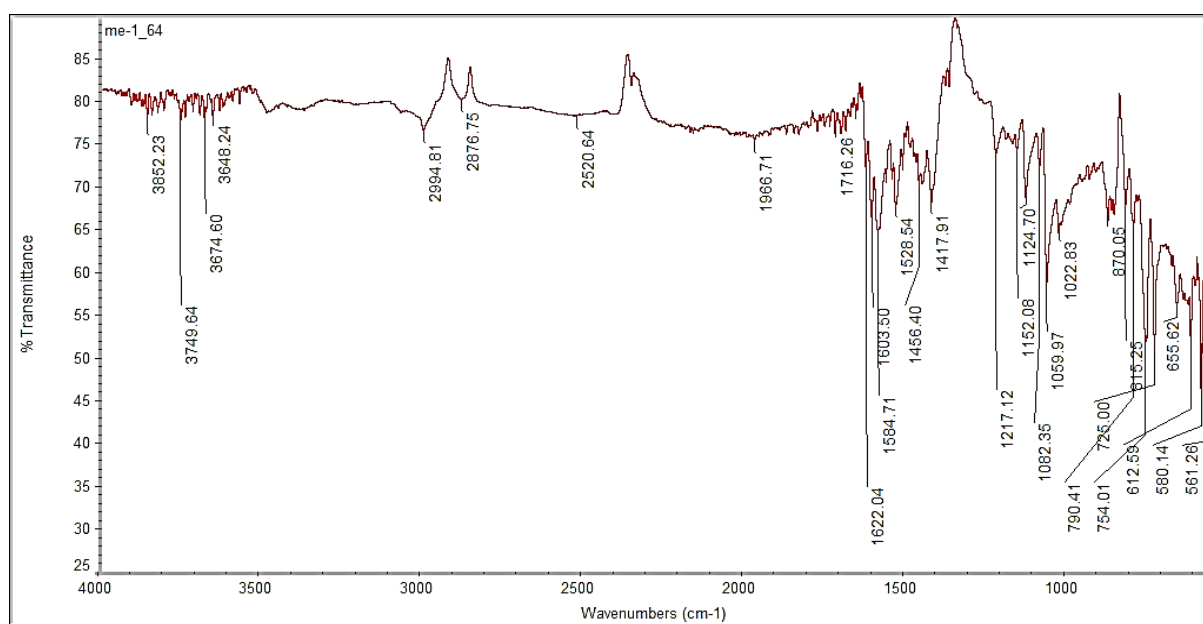

Figure S15: IR spectrum of compound Me-INDP
